# Supplementary material for: Acridine based (S,N,S) pincer ligand: designing silver(i) complexes for the efficient activation of A3 (aldehyde, alkyne and amine) coupling
Source: Royal Society of Chemistry journal article supplement (doi:10.1039/c4dt02813a), 2014-11-19
Supplement: c4dt02813a1.pdf [file c4dt02813a1.pdf]

## Electronic Supplementary Information

### Acridine based (S,N,S) pincer ligand: designing of silver(I) complexes for efficient activation of A<sup>3</sup>(aldehyde, alkyne and amine) coupling

Om Prakash, Hemant Joshi, Umesh Kumar, Alpesh K. Sharma, Ajai K. Singh\*

Department of Chemistry, Indian Institute of Technology Delhi, New Delhi 110016, India

**Table S1 Crystal Data and Structural Refinements for 1 and 2**

| Structural Parameters                                        | 1                                                                                                                                               | 2                                                                                                                                             |
|--------------------------------------------------------------|-------------------------------------------------------------------------------------------------------------------------------------------------|-----------------------------------------------------------------------------------------------------------------------------------------------|
| Empirical formula                                            | C <sub>29</sub> H <sub>24</sub> N <sub>3</sub> O <sub>3</sub> AgS <sub>2</sub>                                                                  | C <sub>54</sub> H <sub>42</sub> N <sub>4</sub> O <sub>6</sub> Ag <sub>2</sub> S <sub>4</sub> .CH <sub>3</sub> CN                              |
| Formula wt.                                                  | 634.52                                                                                                                                          | 1227.99                                                                                                                                       |
| Crystal size [mm]                                            | 0.42 × 0.22 × 0.18                                                                                                                              | 0.40 × 0.16 × 0.12                                                                                                                            |
| Crystal system                                               | Monoclinic                                                                                                                                      | Monoclinic                                                                                                                                    |
| Space group                                                  | <i>P</i> 2(1) <i>n</i>                                                                                                                          | <i>P</i> 21                                                                                                                                   |
| Unit Cell dimension                                          | <i>a</i> = 9.7209(4) Å<br><i>b</i> = 16.6776(7) Å<br><i>c</i> = 17.4452(7) Å<br>$\alpha$ = 90.00°<br>$\beta$ = 105.202(2)°<br>$\gamma$ = 90.00° | <i>a</i> = 8.4602(17) Å<br><i>b</i> = 18.321(4) Å<br><i>c</i> = 16.881(4) Å<br>$\alpha$ = 90.00°<br>$\beta$ = 93.979(4)°<br>$\gamma$ = 90.00° |
| Volume [Å <sup>3</sup> ]                                     | 2729.27(19)                                                                                                                                     | 2610.2(10)                                                                                                                                    |
| <i>Z</i>                                                     | 4                                                                                                                                               | 2                                                                                                                                             |
| Density (Calc.) [Mg.m <sup>-3</sup> ]                        | 1.544                                                                                                                                           | 1.562                                                                                                                                         |
| Absorption coeff. [mm <sup>-1</sup> ]                        | 0.928                                                                                                                                           | 0.966                                                                                                                                         |
| <i>F</i> (000)                                               | 1288                                                                                                                                            | 1244.0                                                                                                                                        |
| $\theta$ range [°]                                           | 1.92–25.00                                                                                                                                      | 1.21–25.00                                                                                                                                    |
| Index ranges                                                 | –11 ≤ <i>h</i> ≤ 11<br>–19 ≤ <i>k</i> ≤ 19<br>–20 ≤ <i>l</i> ≤ 20                                                                               | –10 ≤ <i>h</i> ≤ 10<br>–21 ≤ <i>k</i> ≤ 21<br>–20 ≤ <i>l</i> ≤ 20                                                                             |
| Reflections collected                                        | 32540                                                                                                                                           | 25052                                                                                                                                         |
| Independent reflections ( <i>R</i> <sub>int</sub> )          | 4693(0.0352)                                                                                                                                    | 9168(0.0535)                                                                                                                                  |
| Max./min. Transmission                                       | 0.849 / 0.780                                                                                                                                   | 0.894 / 0.828                                                                                                                                 |
| Data/restraints/ parameters                                  | 4693 / 0 / 344                                                                                                                                  | 9168 / 0 / 659                                                                                                                                |
| Goodness-of-fit on <i>F</i> <sup>2</sup>                     | 1.040                                                                                                                                           | 1.001                                                                                                                                         |
| Final <i>R</i> indices [ <i>I</i> > 2 $\sigma$ ( <i>I</i> )] | <i>R</i> 1 = 0.0414<br><i>wR</i> 2 = 0.1016                                                                                                     | <i>R</i> 1 = 0.0404<br><i>wR</i> 2 = 0.0800                                                                                                   |
| <i>R</i> indices (all data)                                  | <i>R</i> 1 = 0.0619<br><i>wR</i> 2 = 0.1115                                                                                                     | <i>R</i> 1 = 0.0543<br><i>wR</i> 2 = 0.0845                                                                                                   |
| Largest diff. peak/hole [e.Å <sup>-3</sup> ]                 | 0.882 / -0.266                                                                                                                                  | 0.730 / -0.257                                                                                                                                |

**Table S2 Bond Lengths and Bond Angles of 1 and 2**

| Complex     | Bond Length[Å] |                    | Bond Angle[°]        |            |
|-------------|----------------|--------------------|----------------------|------------|
| <b>1</b>    | Ag(1) — S(1)   | 2.5682(11)         | N(2) — Ag(1) — S(1)  | 123.43(11) |
|             | Ag(1) — S(2)   | 2.5017(11)         | N(2) — Ag(1) — O(1)  | 92.86(15)  |
|             | N(2) — Ag(1)   | 2.329(4)           | N(2) — Ag(1) — S(2)  | 105.79(11) |
|             | O(1) — Ag(1)   | 2.499(4)           | O(1) — Ag(1) — S(1)  | 107.27(10) |
|             | C(19) — N(1)   | 1.350(5)           | O(1) — Ag(1) — S(2)  | 94.96(12)  |
|             | C(7) — S(1)    | 1.831(4)           | S(1) — Ag(1) — S(2)  | 123.59(4)  |
|             | C(21) — S(2)   | 1.839(4)           | C(7) — S(1) — Ag(1)  | 103.31(13) |
|             | N(3) — O(1)    | 1.198(5)           | C(21) — S(1) — Ag(1) | 106.54(14) |
|             | N(3) — O(2)    | 1.234(5)           | O(1) — N(3) — O(2)   | 120.1(4)   |
|             | N(3) — O(3)    | 1.185(6)           | O(2) — N(3) — O(3)   | 120.5(5)   |
|             |                |                    | O(3) — N(3) — O(1)   | 119.3(5)   |
| <b>2</b>    |                |                    | C(28) — N(2) — Ag(1) | 157.8(4)   |
|             | Ag(1) — S(1)   | 2.4894(15)         | N(1) — Ag(1) — S(1)  | 88.81(10)  |
|             | Ag(1) — S(2)   | 2.4834(15)         | N(1) — Ag(1) — O(1)  | 88.90(15)  |
|             | N(1) — Ag(1)   | 2.660(4)           | N(1) — Ag(1) — O(2)  | 137.60(13) |
|             | O(1) — Ag(1)   | 2.384(4)           | N(1) — Ag(1) — S(2)  | 86.76(11)  |
|             | O(2) — Ag(1)   | 2.690(5)           | O(1) — Ag(1) — S(1)  | 120.13(11) |
|             | C(19) — N(1)   | 1.350(5)           | O(1) — Ag(1) — S(2)  | 113.76(11) |
|             | C(7) — S(1)    | 1.838(5)           | S(1) — Ag(1) — S(2)  | 125.79(5)  |
|             | C(21) — S(2)   | 1.848(5)           | O(2) — Ag(1) — S(1)  | 108.82(12) |
|             | N(2) — O(1)    | 1.230(6)           | O(2) — Ag(1) — S(2)  | 110.28(12) |
|             | N(2) — O(2)    | 1.242(6)           | O(1) — Ag(1) — O(2)  | 48.77(14)  |
| N(2) — O(3) | 1.230(6)       | O(1) — N(2) — O(2) | 117.5(5)             |            |

**Table S3 Non-covalent interactions C–H···O distances in (Å) found in the crystal lattice of complex 1 and 2**

| <b>1</b>            |          | <b>2</b>            |          |
|---------------------|----------|---------------------|----------|
| C(16)–H(16)···O(2)  | 2.629(4) | C(2)–H(2)···O(1)    | 2.553(4) |
| C(17)–H(17)···O(1)  | 2.819(4) | C(6)–H(6)···O(4)    | 2.834(7) |
| C(18)–H(18)···O(1)  | 2.580(4) | C(9)–H(9)···O(6)    | 3.018(7) |
| C(21)–H(21B)···O(3) | 2.650(4) | C(11)–H(11)···O(2)  | 2.789(7) |
| C(23)–H(23)···O(1)  | 2.737(4) | C(14)–H(14)···O(2)  | 2.482(6) |
| C(24)–H(24)···O(1)  | 2.800(5) | C(17)–H(17)···O(3)  | 2.802(6) |
| C(25)–H(25)···O(1)  | 2.869(3) | C(44)–H(44)···O(5)  | 2.654(7) |
| C(27)–H(27)···O(3)  | 2.437(4) | C(56)–H(56C)···O(3) | 2.697(5) |

**NMR Spectra:**

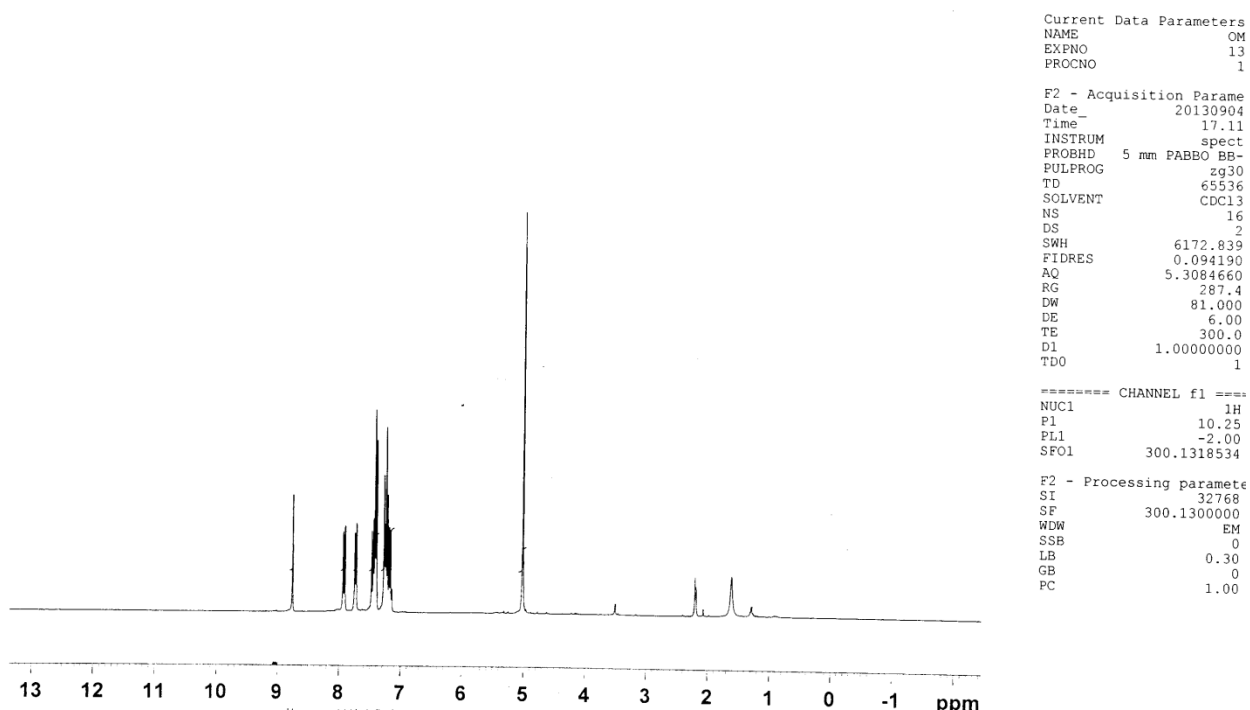

**Figure S1. <sup>1</sup>H NMR spectra of SNS Pincer Ligand L**

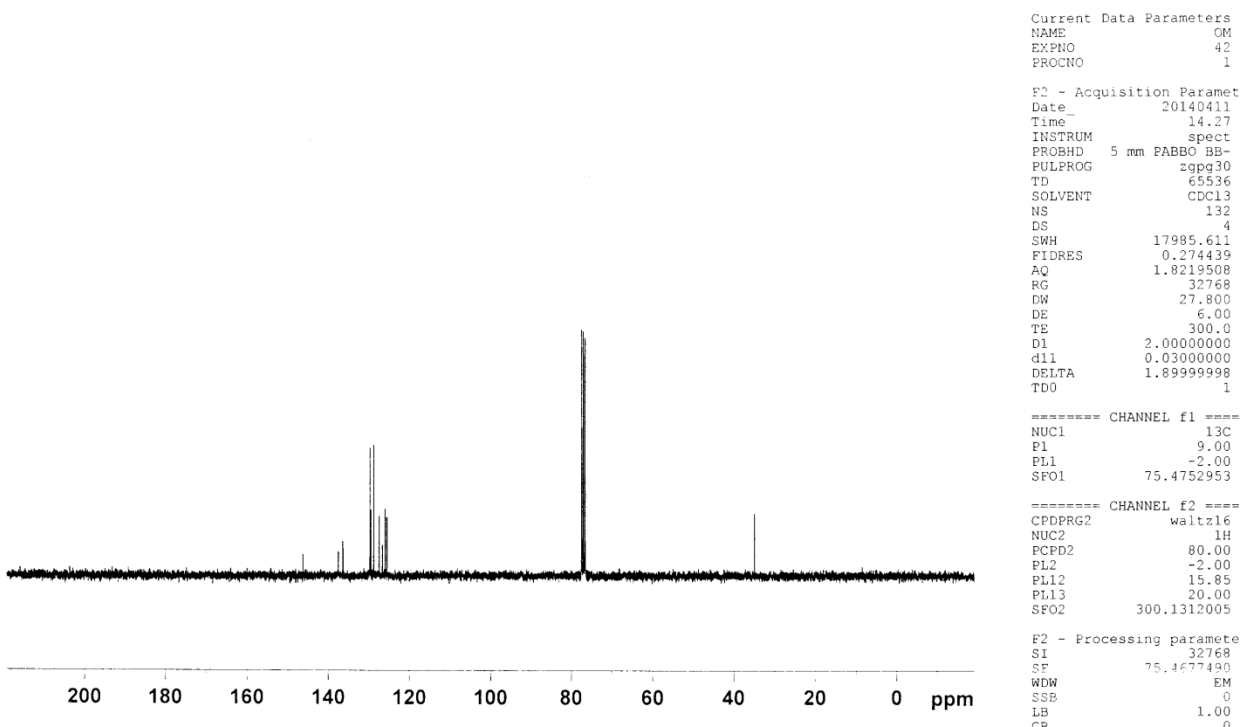

Figure S2.  $^{13}\text{C}\{^1\text{H}\}$  NMR spectra of SNS Pincer Ligand L

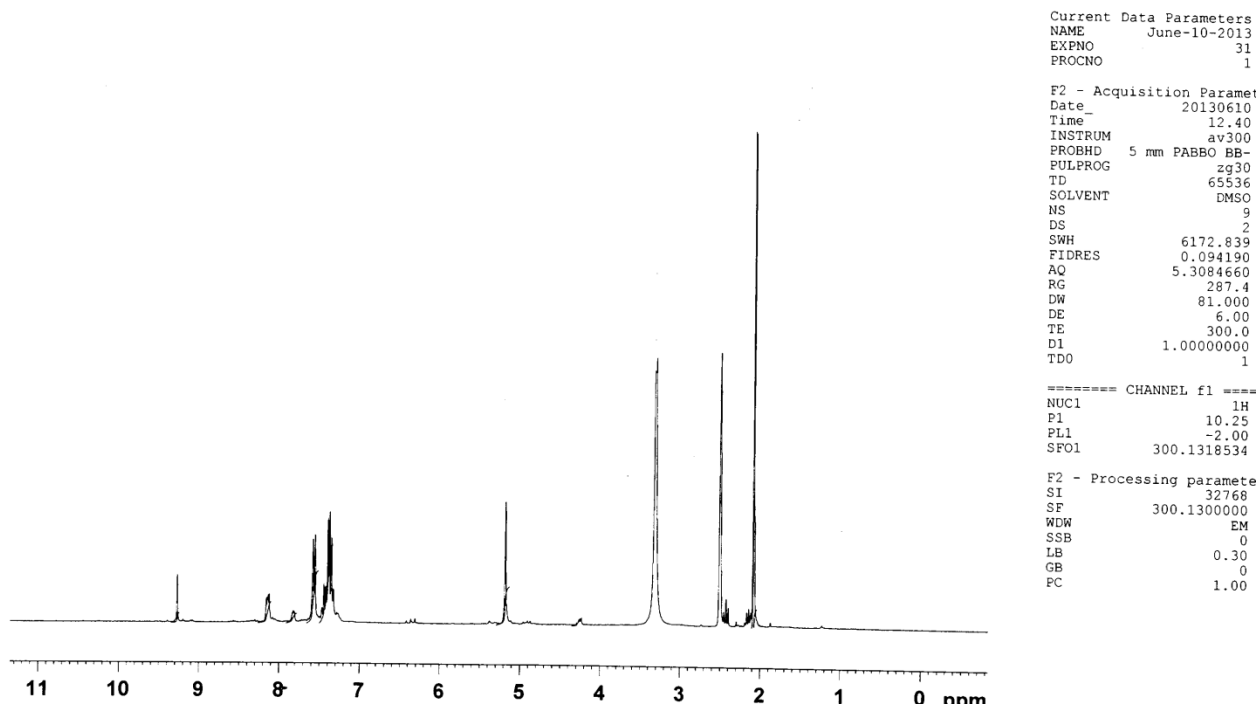

Figure S3.  $^1\text{H}$  NMR spectra of Complex 1

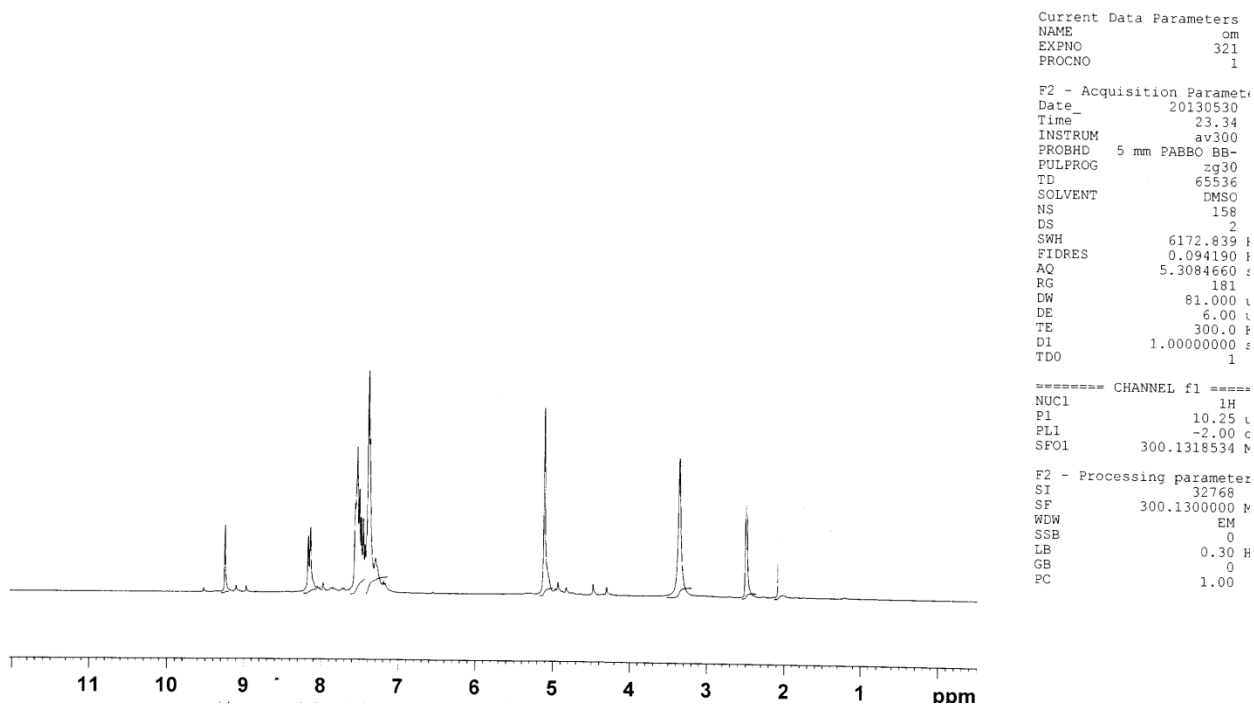

Figure S4. <sup>1</sup>H NMR spectra of Complex 2

### Mass Spectrum SmartFormula Report

**Analysis Info** Acquisition Date 6/5/2013 11:15:25 AM  
 Analysis Name D:\Data\JUNE\_2013\OM3.d  
 Method tune\_low.m Operator Sharma/Singh  
 Sample Name Instrument / Ser# micrOTOF-Q II 10262  
 Comment

**Acquisition Parameter**

|             |            |                       |           |                  |           |
|-------------|------------|-----------------------|-----------|------------------|-----------|
| Source Type | ESI        | Ion Polarity          | Positive  | Set Nebulizer    | 0.3 Bar   |
| Focus       | Not active | Set Capillary         | 4500 V    | Set Dry Heater   | 180 °C    |
| Scan Begin  | 50 m/z     | Set End Plate Offset  | -500 V    | Set Dry Gas      | 4.0 l/min |
| Scan End    | 1500 m/z   | Set Collision Cell RF | 100.0 Vpp | Set Divert Valve | Source    |

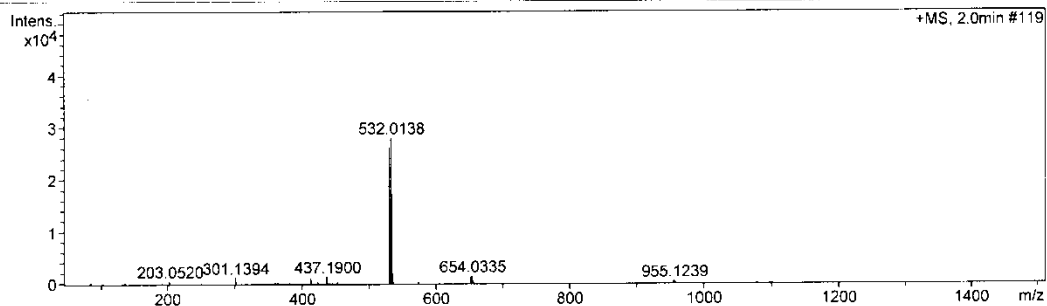

| Meas. m/z | # | Formula                                           | Score  | m/z      | err [ppm] | Mean err [ppm] | mSig ma | rdb  | e <sup>-</sup> Conf | N-Ru le |
|-----------|---|---------------------------------------------------|--------|----------|-----------|----------------|---------|------|---------------------|---------|
| 530.0143  | 1 | C <sub>27</sub> H <sub>21</sub> AgNS <sub>2</sub> | 100.00 | 530.0161 | 3.4       | 3.5            | 2.4     | 17.5 | even                | ok      |

Figure S5. Mass spectra of Complex 1

## Mass Spectrum SmartFormula Report

**Analysis Info**

Analysis Name D:\Data\APRIL\_2014\OM1.d  
 Method tune\_wide.m  
 Sample Name TM 1:100  
 Comment

Acquisition Date 4/29/2014 11:40:31 AM

Operator Sharma/Singh  
 Instrument / Ser# micrOTOF-Q II 10262

**Acquisition Parameter**

|             |          |                       |           |                  |           |
|-------------|----------|-----------------------|-----------|------------------|-----------|
| Source Type | ESI      | Ion Polarity          | Positive  | Set Nebulizer    | 0.3 Bar   |
| Focus       | Active   | Set Capillary         | 4500 V    | Set Dry Heater   | 180 °C    |
| Scan Begin  | 50 m/z   | Set End Plate Offset  | -500 V    | Set Dry Gas      | 4.0 l/min |
| Scan End    | 3000 m/z | Set Collision Cell RF | 600.0 Vpp | Set Divert Valve | Source    |

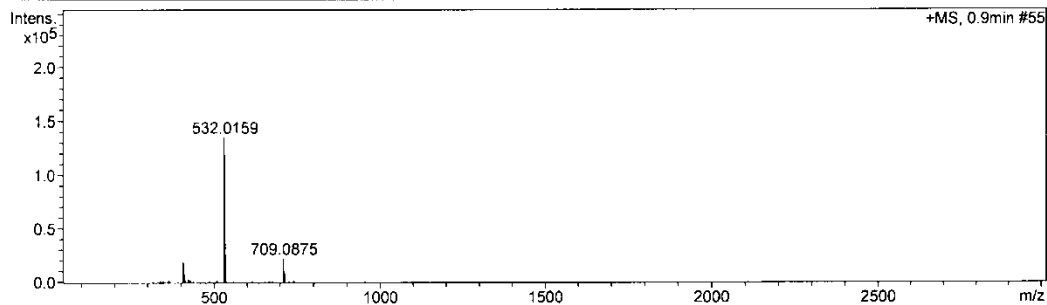

| Meas. #  | m/z | Formula                                           | m/z      | err [ppm] | Me an err [ppm] | rdb  | N-Ru | e <sup>-</sup> Conf | mS igma | Std l | Std Me an m/z | Std l Var | Std m/z Diff | Std Com b Dev |
|----------|-----|---------------------------------------------------|----------|-----------|-----------------|------|------|---------------------|---------|-------|---------------|-----------|--------------|---------------|
| 530.0162 | 1   | C <sub>27</sub> H <sub>21</sub> AgNS <sub>2</sub> | 530.0161 | -0.2      | 1.3             | 17.5 | ok   | even                | 8.7     | 8.6   | 1.6           | 3.3       | 2.2          | 842.7         |

**Figure S6. Mass spectra of Complex 2**

### NMR Data of Catalysis Products<sup>1</sup>:

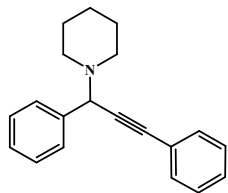

<sup>1</sup>H NMR (CDCl<sub>3</sub>, 25 °C vs Me<sub>4</sub>Si) δ (ppm): 1.42–1.51 (m, 2H), 1.52–1.70 (m, 4H), 2.51–2.62 (m, 4H), 4.80 (s, 1H), 7.25–7.40 (m, 5H), 7.42–7.54 (m, 3H), 7.61–7.65 (m, 2H).

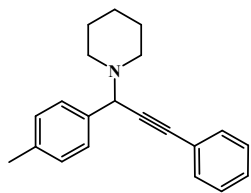

<sup>1</sup>H NMR (CDCl<sub>3</sub>, 25 °C vs Me<sub>4</sub>Si) δ (ppm): 1.43–1.56 (m, 2H), 1.56–1.78 (m, 4H), 2.40 (s, 3H), 2.55–2.69 (m, 4H), 4.84 (s, 1H), 7.22–7.44 (m, 5H), 7.49–7.55 (m, 2H), 7.57–7.61 (m, 2H).

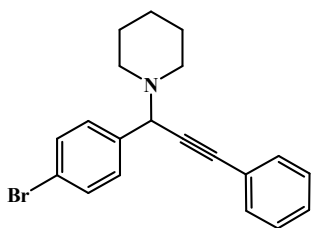

<sup>1</sup>H NMR (CDCl<sub>3</sub>, 25 °C vs Me<sub>4</sub>Si) δ (ppm): 1.47–1.56 (m, 2H), 1.58–1.74 (m, 4H), 2.55–2.66 (m, 4H), 4.81 (s, 1H), 7.32–7.53 (m, 5H), 7.57–7.60 (m, 2H), 7.61–7.64 (m, 2H).

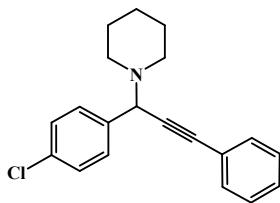

<sup>1</sup>H NMR (CDCl<sub>3</sub>, 25 °C vs Me<sub>4</sub>Si) δ (ppm): 1.45–1.55 (m, 2H), 1.56–1.71 (m, 4H), 2.54–2.62 (m, 4H), 4.80 (s, 1H), 7.34–7.48 (m, 5H), 7.54–7.58 (m, 2H), 7.60–7.65 (m, 2H).

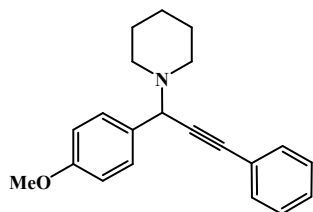

$^1\text{H NMR}$  ( $\text{CDCl}_3$ ,  $25\text{ }^\circ\text{C}$  vs  $\text{Me}_4\text{Si}$ )  $\delta$  (ppm): 1.41–1.53 (m, 2H), 1.54–1.70 (m, 4H), 2.52–2.65 (m, 4H), 3.82 (s, 3H), 4.78 (s, 1H), 6.94–7.38 (m, 5H), 7.54–7.62 (m, 4H).

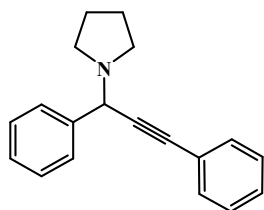

$^1\text{H NMR}$  ( $\text{CDCl}_3$ ,  $25\text{ }^\circ\text{C}$  vs  $\text{Me}_4\text{Si}$ )  $\delta$  (ppm): 1.78–1.91 (m, 4H), 2.69–2.82 (m, 4H), 4.92 (s, 1H), 7.28–7.38 (m, 4H), 7.39–7.43 (m, 2H), 7.53–7.68 (m, 4H).

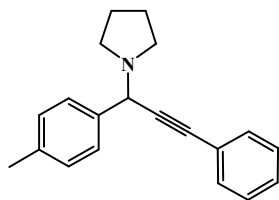

$^1\text{H NMR}$  ( $\text{CDCl}_3$ ,  $25\text{ }^\circ\text{C}$  vs  $\text{Me}_4\text{Si}$ )  $\delta$  (ppm): 1.80–1.88 (m, 4H), 2.42 (s, 3H), 2.72–2.80 (m, 4H), 4.90 (s, 1H), 7.21–7.25 (m, 2H), 7.32–7.40 (m, 3H), 7.52–7.59 (m, 4H).

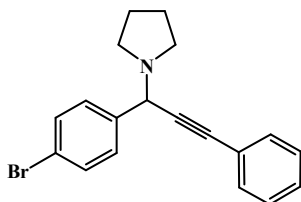

$^1\text{H NMR}$  ( $\text{CDCl}_3$ ,  $25\text{ }^\circ\text{C}$  vs  $\text{Me}_4\text{Si}$ )  $\delta$  (ppm): 1.81–1.85 (m, 4H), 2.66–2.70 (m, 4H), 4.91 (s, 1H), 7.35–7.42 (m, 5H), 7.52–7.58 (m, 2H), 7.58–7.62 (m, 2H).



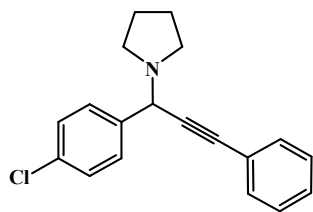

$^1\text{H}$  NMR ( $\text{CDCl}_3$ , 25 °C vs  $\text{Me}_4\text{Si}$ )  $\delta$  (ppm): 1.80–1.84 (m, 4H), 2.65–2.68 (m, 4H), 4.89 (s, 1H), 7.33–7.39 (m, 5H), 7.50–7.55 (m, 2H), 7.56–7.60 (m, 2H).

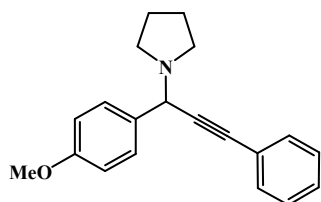

$^1\text{H}$  NMR ( $\text{CDCl}_3$ , 25 °C vs  $\text{Me}_4\text{Si}$ )  $\delta$  (ppm): 1.82–1.85 (m, 4H), 2.68–2.75 (m, 4H), 2.82 (s, 3H), 4.88 (s, 1H), 6.92–6.94 (m, 2H), 7.32–7.36 (m, 3H), 7.50–7.58 (m, 4H).

- (a) C. Wei, Z. Li and C.-J. Li, *Org. Lett.*, 2003, **23**, 4473. (b) X. Yao and C.-J. Li, *Org. Lett.*, 2005, **20**, 4395. (c) Y. Zhao, X. Zhou, T. Okamura, M. Chen, Y. Lu, W.-Y. Sun and J.-Q. Yu, *Dalton Trans.*, 2012, **41**, 5889. (d) M.-T. Chen, B. Landers and O. Navarro, *Org. Biomol. Chem.* 2012, **10**, 2206. (e) Y. Li, X. Chen, Y. Song, L. Fang, G. Zou, *Dalton Trans.*, 2011, **40**, 2046.
